# Supplementary material for: Decreased surface receptors, function, and suboptimal osteoclasts-induced cell expansion in natural killer (NK) cells of elderly subjects
Source: publisher site journal article supplement (doi:10.18632/aging.206226), 2025-03-26
Supplement: Supplementary file [file aging-v17i3-206226-supplementary-material-SD1.pdf]

SUPPLEMENTARY FIGURES

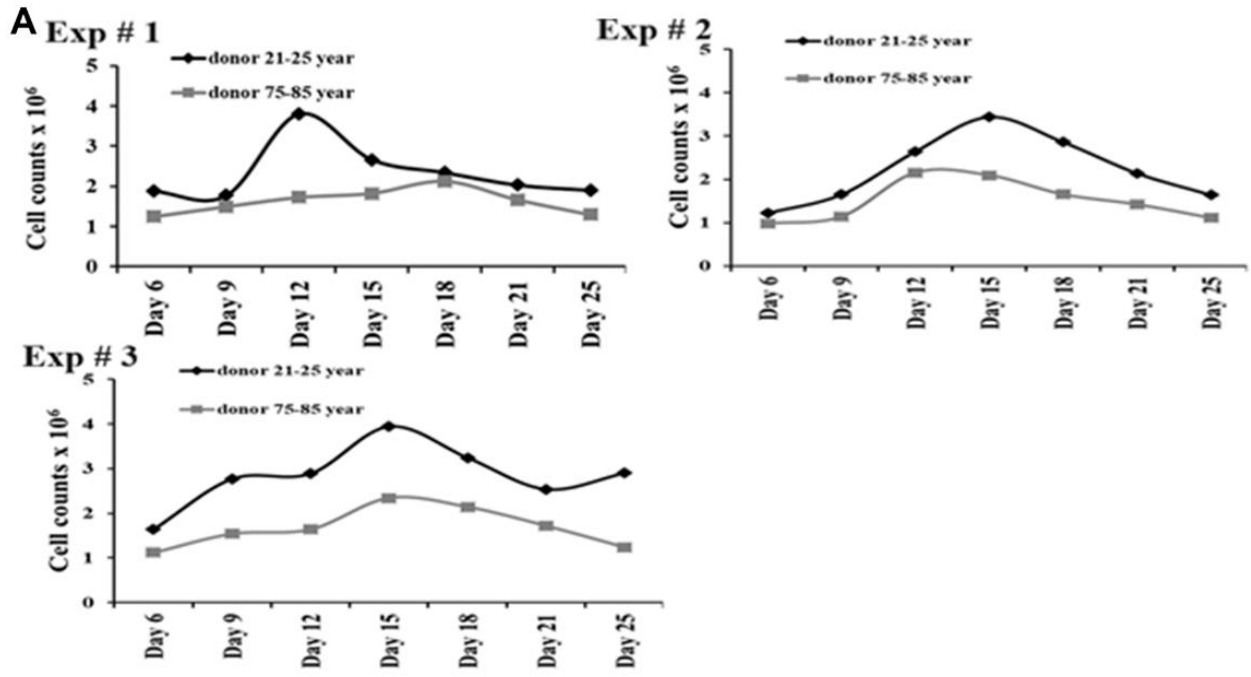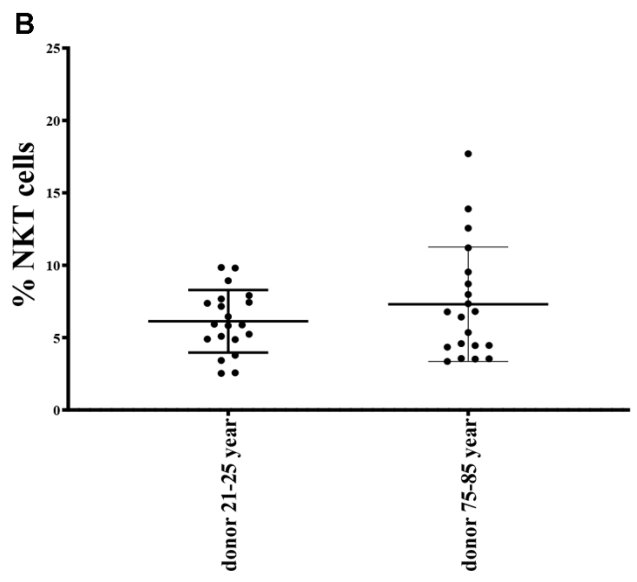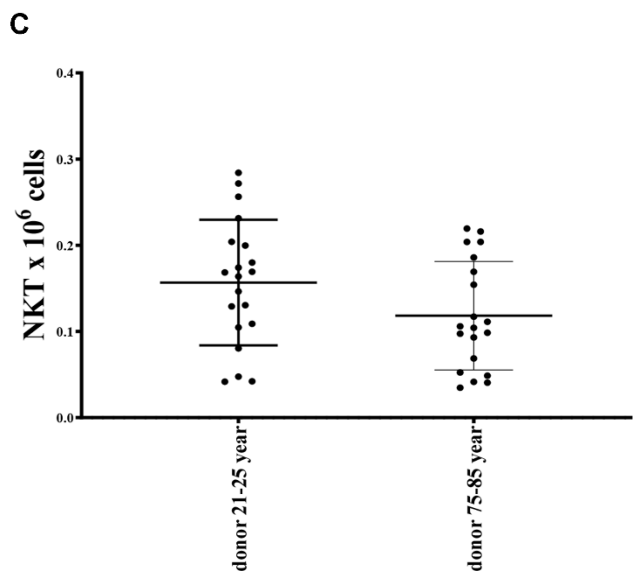

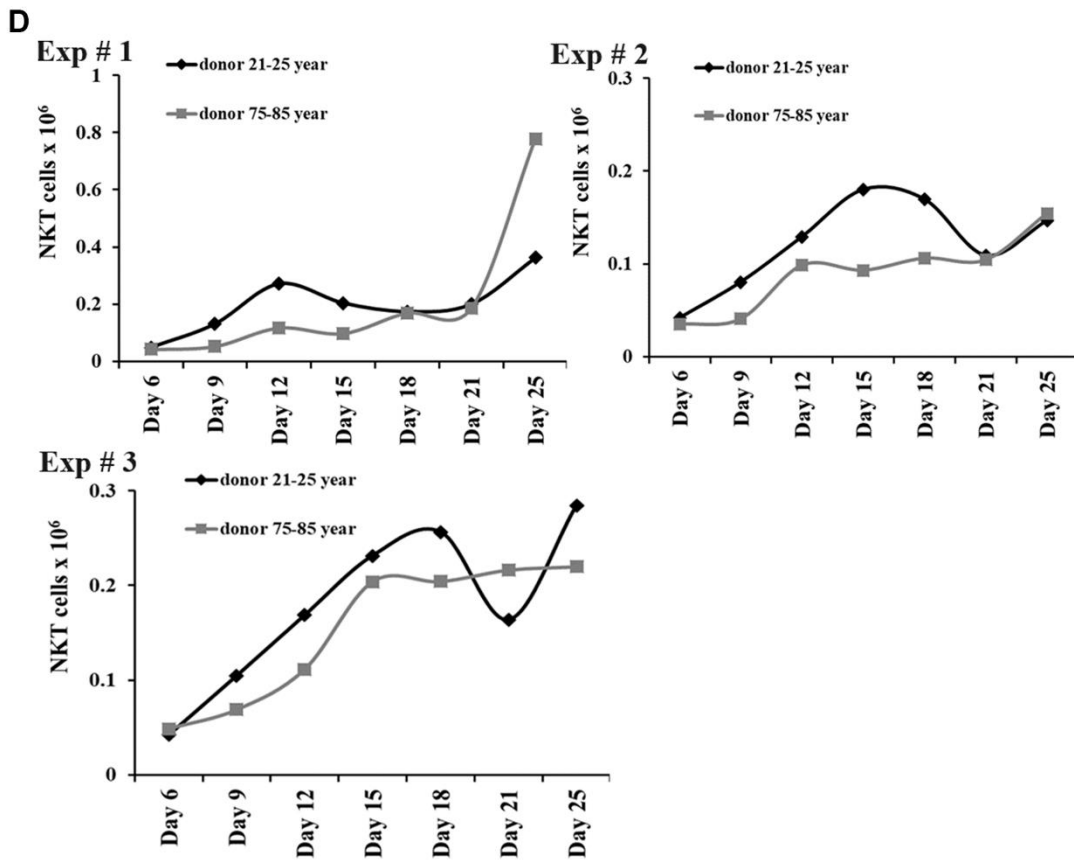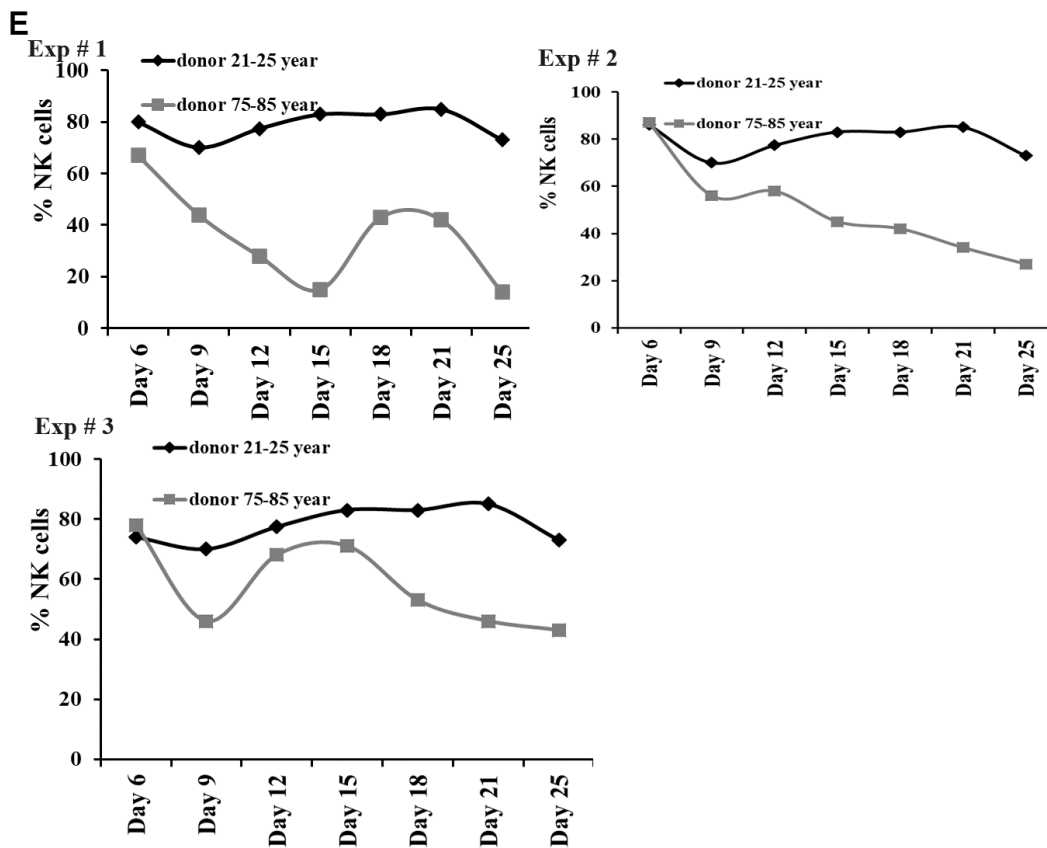

**F**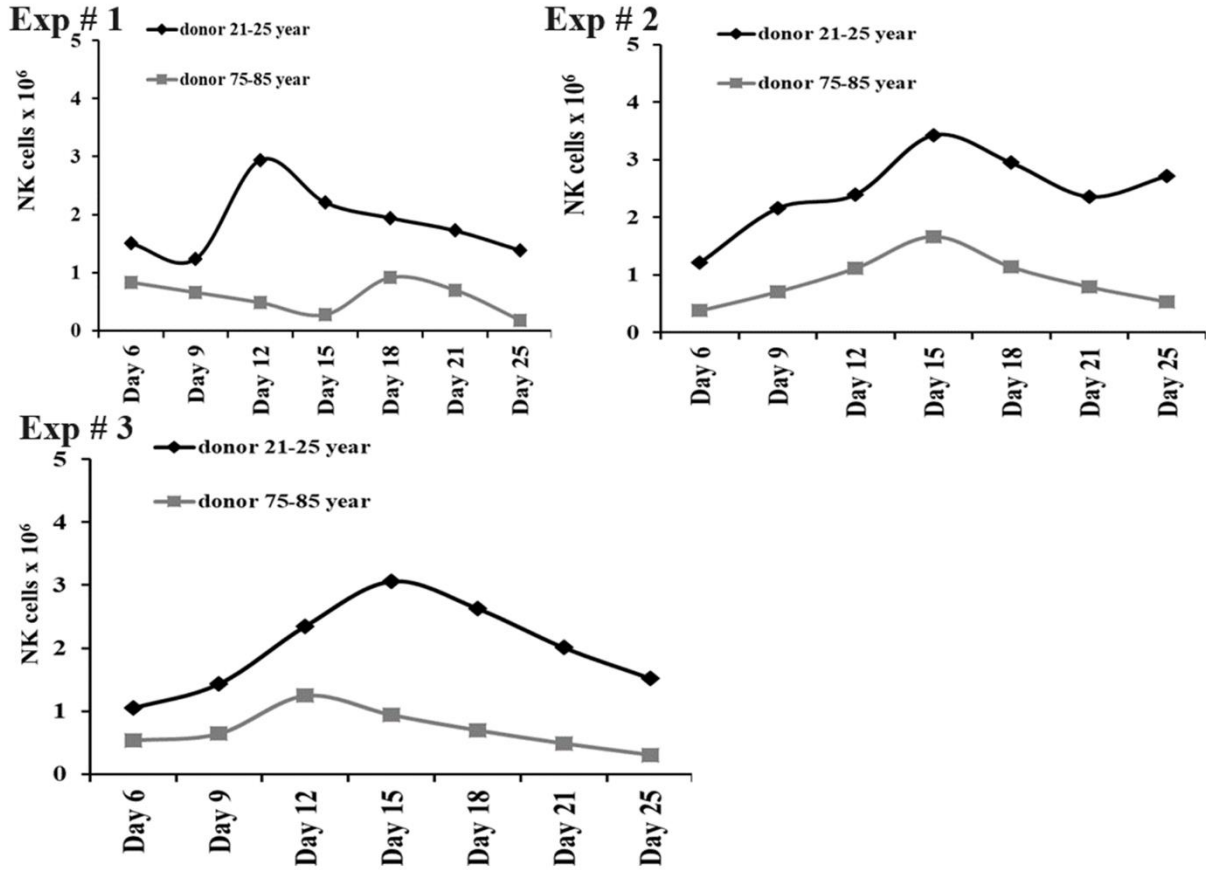**G**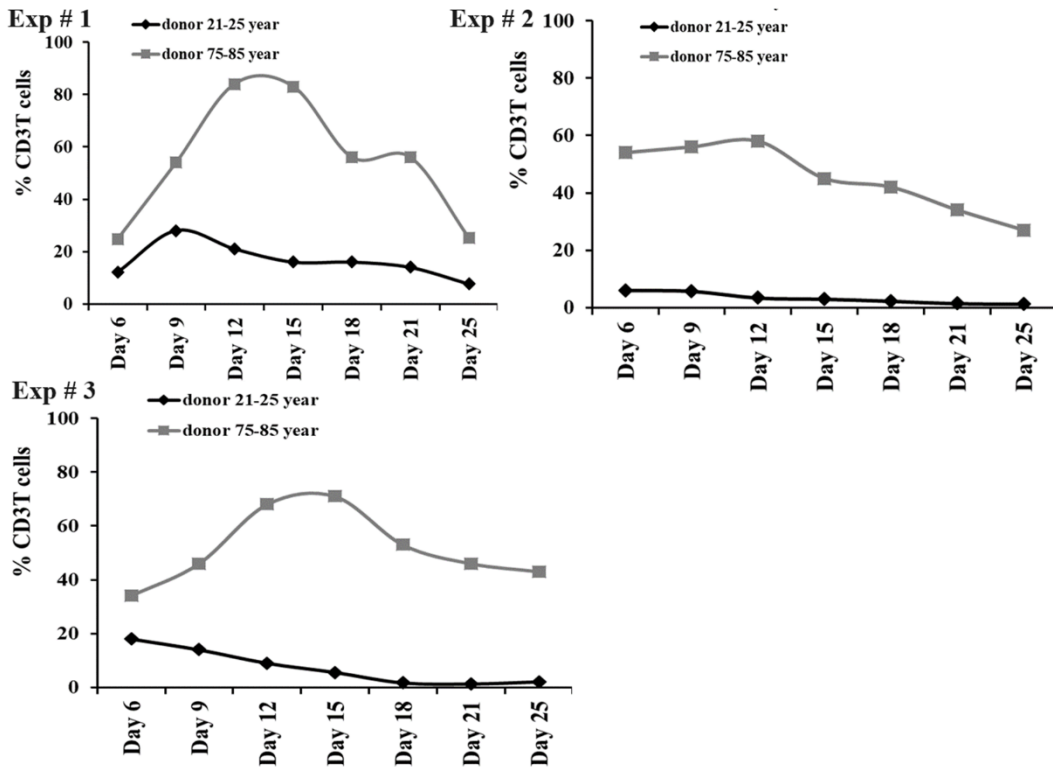

**H**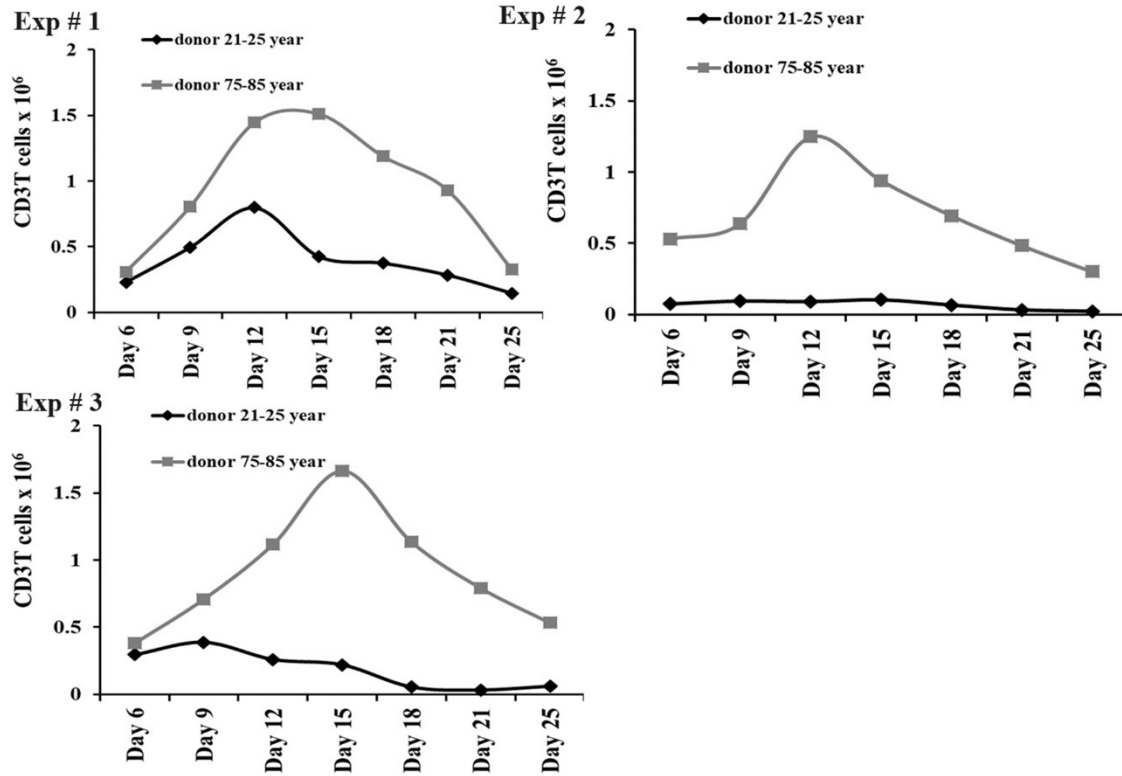**I**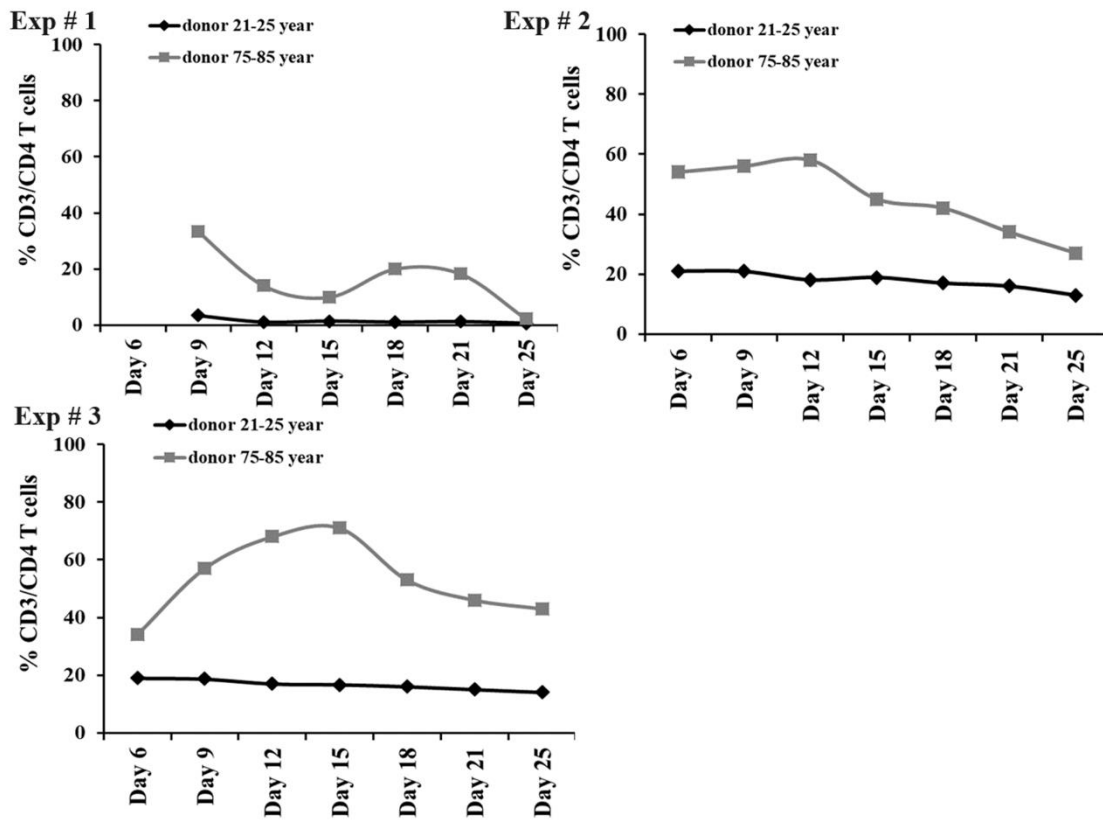

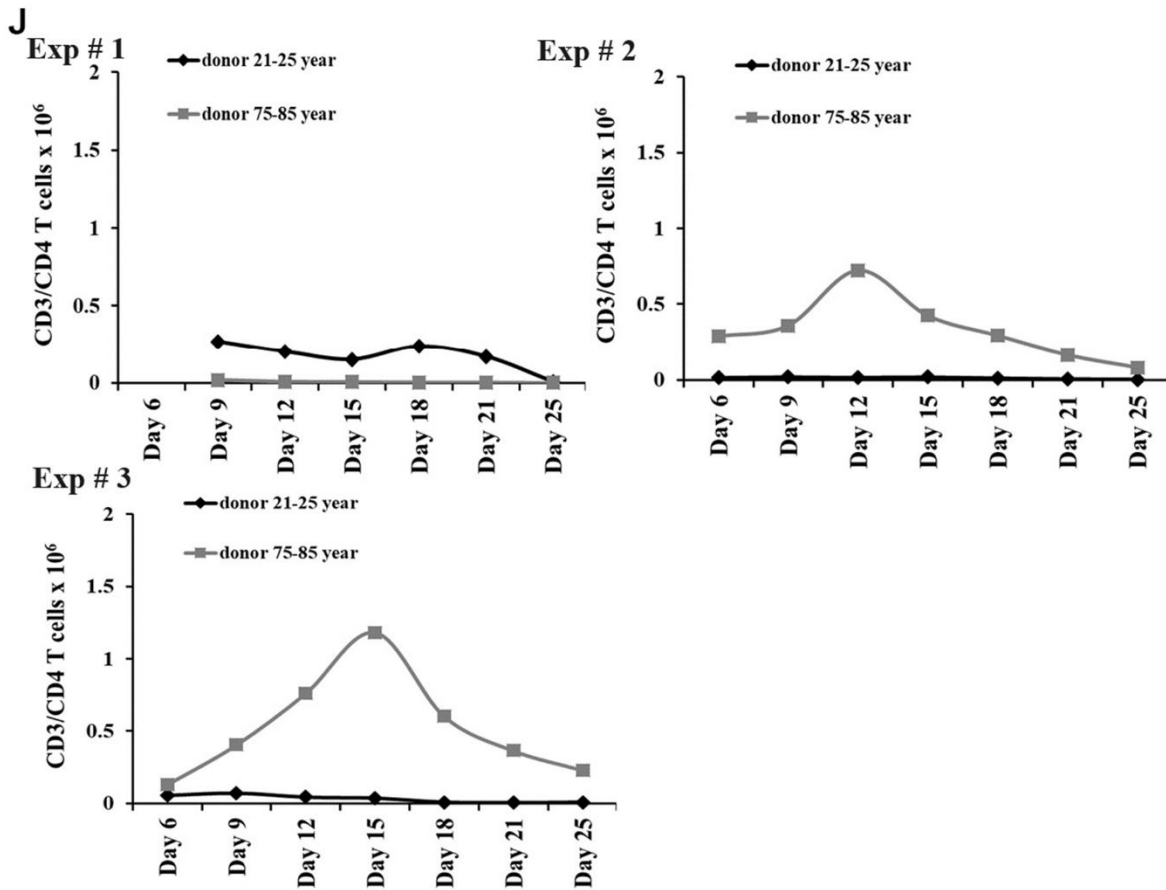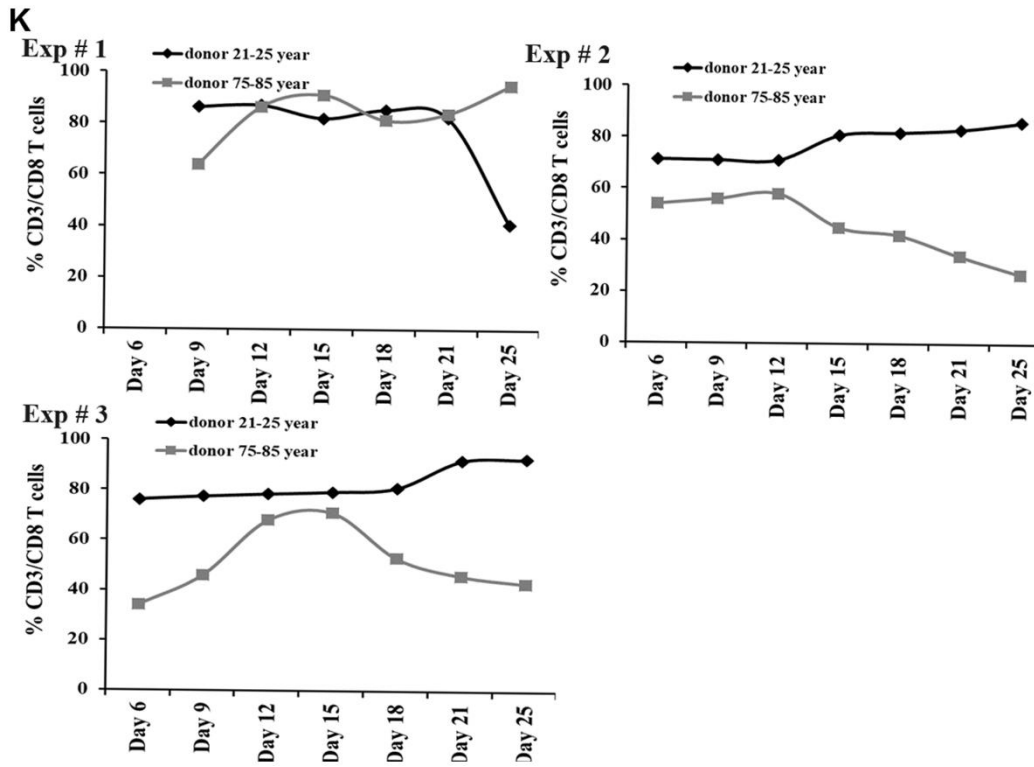

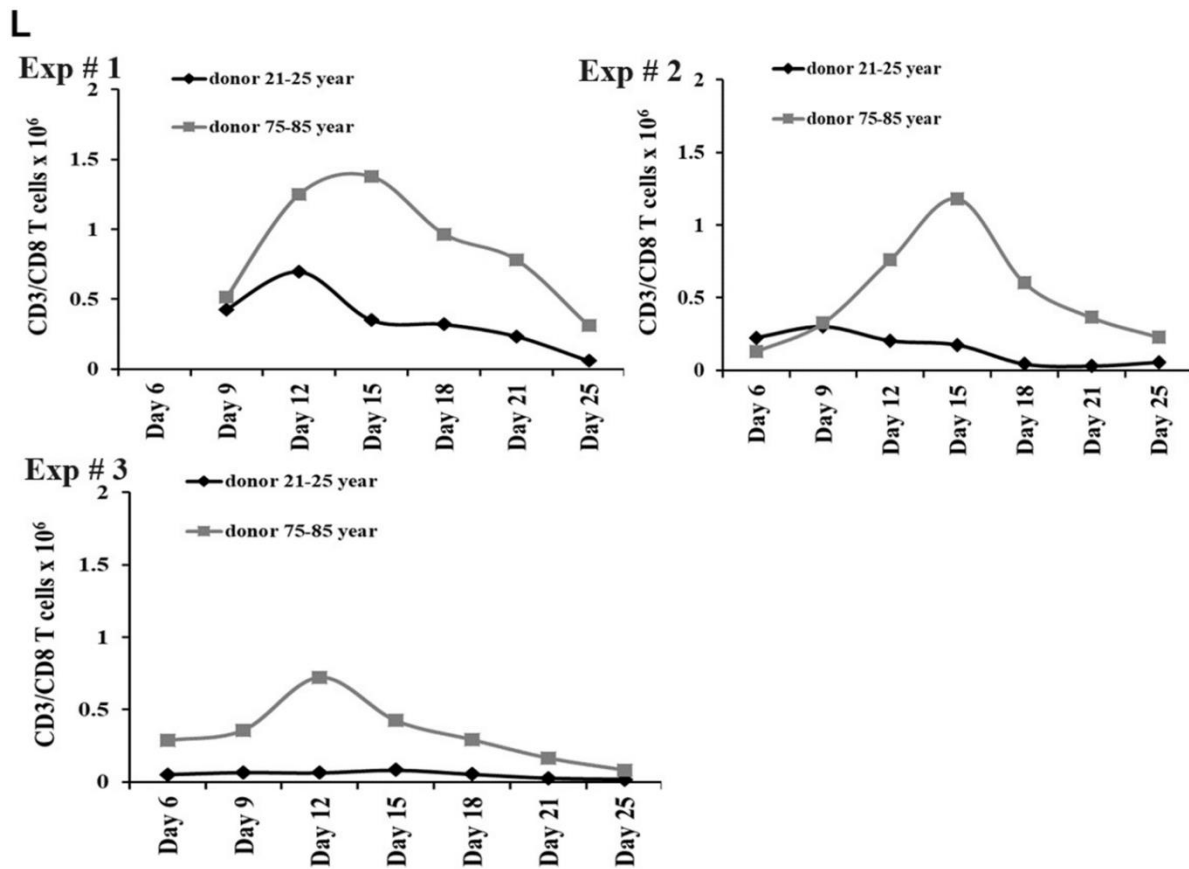

**Supplementary Figure 1. OCs induced lower levels of cell expansion in old-age donor NK cells.** Osteoclasts (OCs) were generated as described in the Materials and Methods section. NK cells ( $0.5 \times 10^6$  cells/ 2ml) were a combination of IL-2 (1000 U/ml) and anti-CD16mAb ( $3 \mu\text{g/ml}$ ) for 18 hours before they were co-cultured with OCs and sAJ2 (1:2:4: OCs:NK:sAJ2). NK cells were counted on days 6, 9, 12, 15, 18, 21, and 25, day 0 counts were  $0.5 \times 10^6$  cells/2 ml, and  $0.5 \times 10^6$  cells/2 ml were cultured every 3 days (A). CD3+CD16+CD56+ NKT cells, and the number of NKT cells (B–D), CD16+CD56+ NK cells and the number of NK cells (E, F), CD3+ T cells and the number of T cells (G, H), CD3+CD4+ T cells and the number of CD4+ T cells (I, J), CD3+CD8+ T cells and the number of CD8+ T cells (K, L), were determined counted on days 6, 9, 12, 15, 18, 21, and 25 in expanding cells.

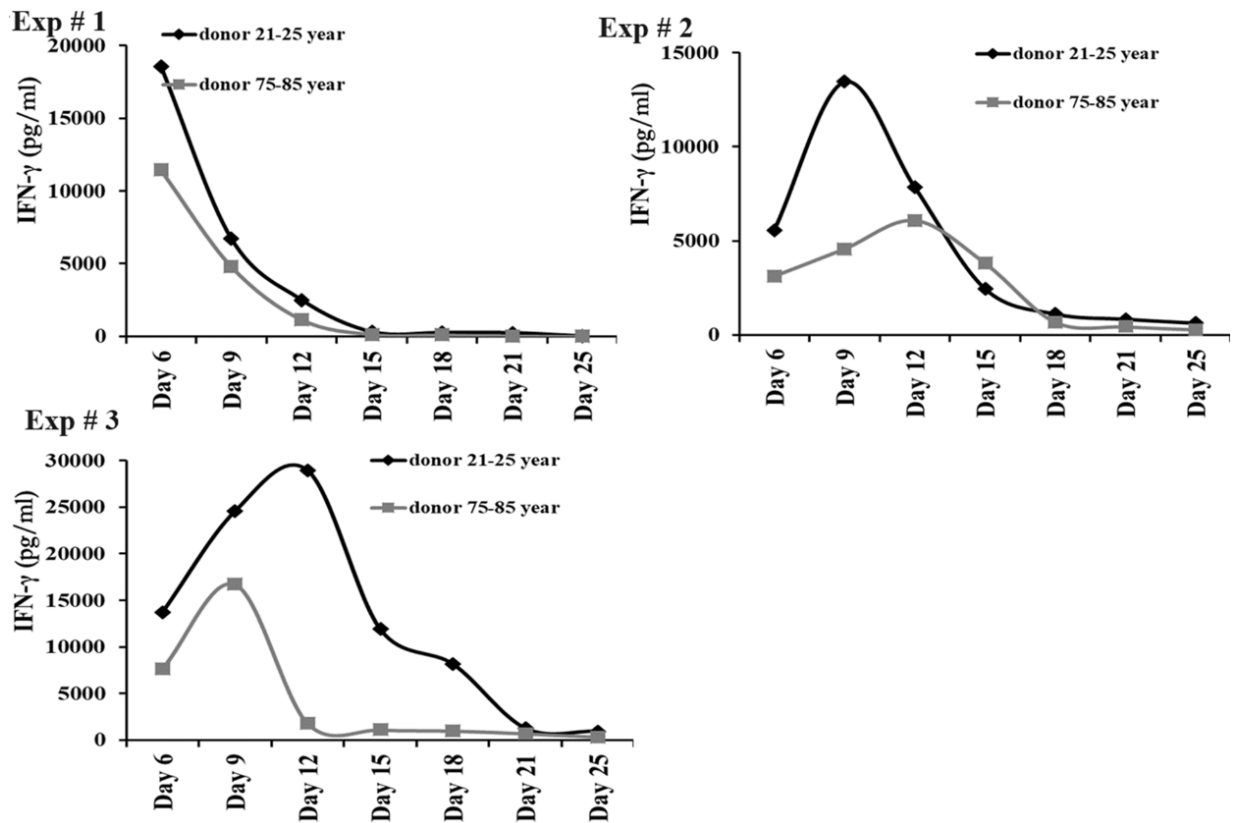

**Supplementary Figure 2. OCs induced lower levels of increased IFN- $\gamma$  secretion in old-age donor NK cells.** Osteoclasts (OCs) were generated as described in the Materials and Methods section. NK cells and OCs co-culture was performed as described in Supplementary Figure 1. The supernatants were harvested from the cultures on days 6, 9, 12, 15, 18, 21, and 25 to determine IFN- $\gamma$  secretion using single ELISA.

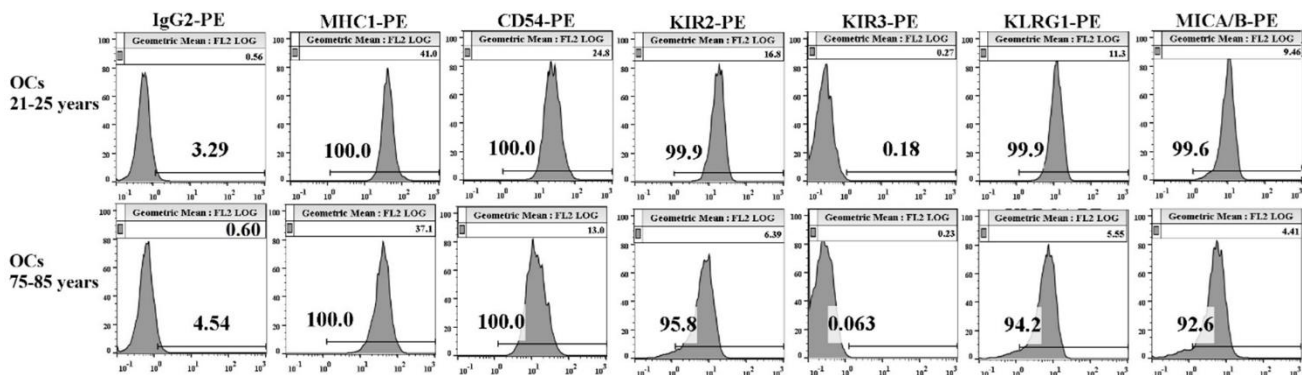

**Supplementary Figure 3. Reduced surface receptor expressions on old age Ocs.** Osteoclasts (OCs) were generated as described in the Materials and Methods section. The surface markers MHC-class I, CD54, KIR2, KIR3, KLRG1, and MICA/B were determined on OCs using flow cytometric analysis (one of two representative experiments is shown in the figure).

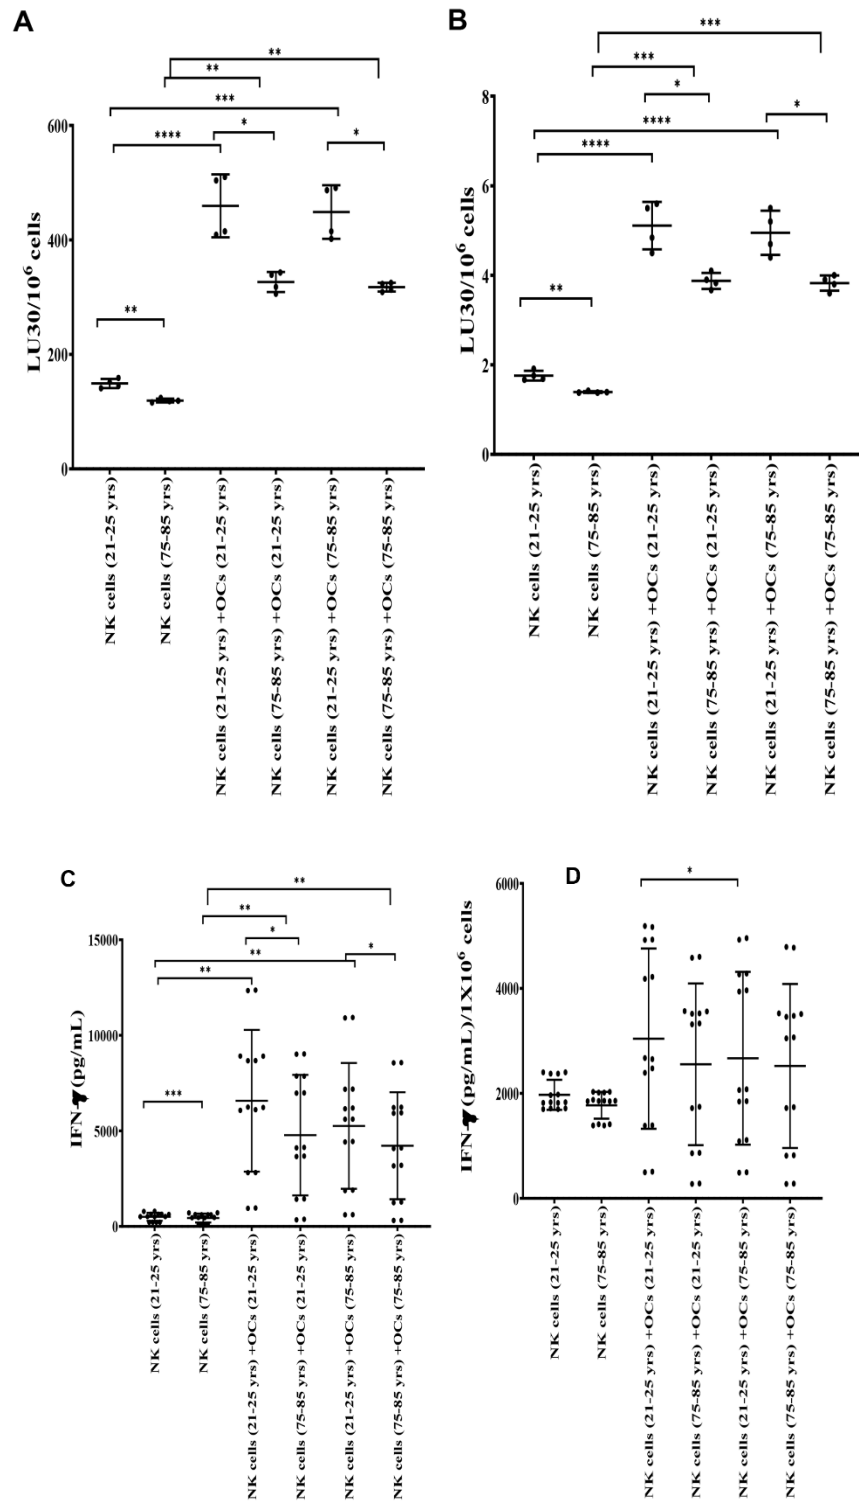

**Supplementary Figure 4. Old-age donor-derived OCSs induced lower levels of activation in NK cells.** Osteoclasts (OCSs) were generated as described in the Materials and Methods section. NK cells ( $0.5 \times 10^6$  cells/2ml) were a combination of IL-2 (1000 U/ml) and anti-CD16mAb (3 $\mu$ g/ml) for 18 hours before they were co-cultured with criss-cross OCSs and sAJ2 (1:2:4: OCSs:NK:sAJ2). NK cell-mediated cytotoxicity against OSCSCs was determined on days 9 and 15 using a standard 4-hour  $^{51}\text{Cr}$  release assay. The lytic units 30/10<sup>6</sup> cells were determined using the inverse number of NK cells required to lyse 30% of OSCSCs  $\times$  100 (A). Lytic units per 1 % NK cells were determined based on the percentages of CD16+/CD56+ NK cells in the cultures obtained by flow cytometric analysis (B). The supernatants were harvested from the cultures on days 6, 9, 12, 15, 18, 21, and 25 to determine IFN- $\gamma$  secretion using single ELISA (C), and the levels were adjusted based on per million of cells (D). \*\*\*\*(p-value <0.0001), \*\*\* (p-value 0.0001-0.001).



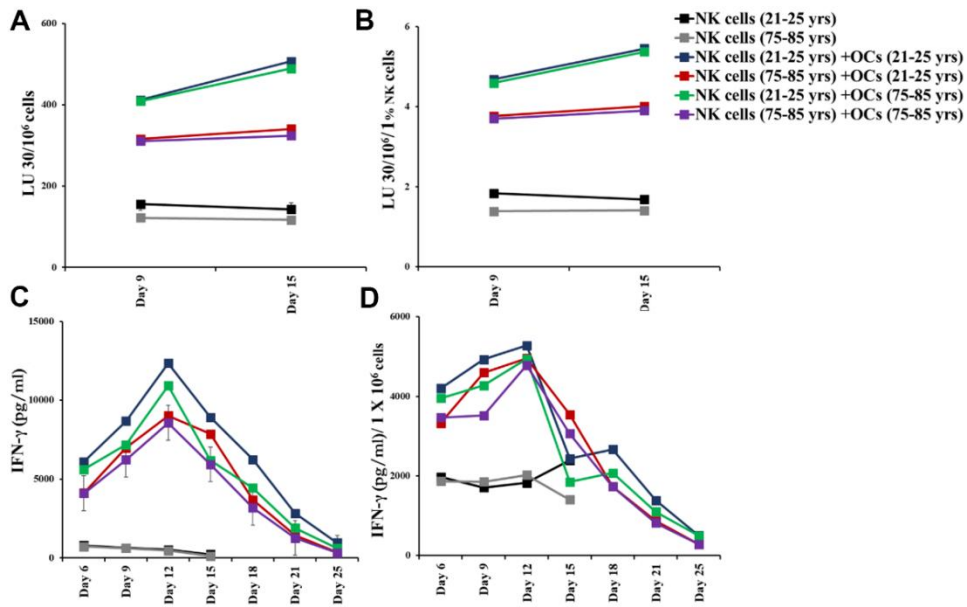

**P-values of Supplementary Figure 5**

**A**

| P values                                               | Day 9 | Day 15 |
|--------------------------------------------------------|-------|--------|
| NK (21-25 y) vs. NK(75-85 y)                           | *     | *      |
| NK (21-25 y) vs. NK(21-25 y)+OCs(21-25 y)              | *     | *      |
| NK (21-25 y) vs. NK(75-85 y)+OCs(21-25 y)              | *     | ****   |
| NK (21-25 y) vs. NK(21-25 y)+OCs(75-85 y)              | *     | ****   |
| NK (21-25 y) vs. NK(75-85 y)+OCs(75-85 y)              | *     | *      |
| NK (75-85 y) vs. NK(21-25 y)+OCs(21-25 y)              | *     | *      |
| NK (75-85 y) vs. NK(75-85 y)+OCs(21-25 y)              | *     | *      |
| NK (75-85 y) vs. NK(21-25 y)+OCs(75-85 y)              | *     | *      |
| NK (75-85 y) vs. NK(75-85 y)+OCs(75-85 y)              | *     | *      |
| NK(21-25 y)+OCs(21-25 y) vs. NK (75-85 y)+OCs(21-25 y) | *     | *      |
| NK(21-25 y)+OCs(21-25 y) vs. NK (21-25 y)+OCs(75-85 y) | ns    | ns     |
| NK(21-25 y)+OCs(21-25 y) vs. NK (75-85 y)+OCs(75-85 y) | *     | *      |
| NK(75-85 y)+OCs(21-25 y) vs. NK (21-25 y)+OCs(75-85 y) | *     | ****   |
| NK(75-85 y)+OCs(21-25 y) vs. NK (75-85 y)+OCs(75-85 y) | ns    | ns     |
| NK(21-25 y)+OCs(75-85 y) vs. NK (75-85 y)+OCs(75-85 y) | ns    | *      |

**B**

| P values                                               | Day 9 | Day 15 |
|--------------------------------------------------------|-------|--------|
| NK (21-25 y) vs. NK(75-85 y)                           | ns    | *      |
| NK (21-25 y) vs. NK(21-25 y)+OCs(21-25 y)              | ns    | *      |
| NK (21-25 y) vs. NK(75-85 y)+OCs(21-25 y)              | *     | ns     |
| NK (21-25 y) vs. NK(21-25 y)+OCs(75-85 y)              | ns    | ns     |
| NK (21-25 y) vs. NK(75-85 y)+OCs(75-85 y)              | ns    | ns     |
| NK (75-85 y) vs. NK(21-25 y)+OCs(21-25 y)              | ns    | *      |
| NK (75-85 y) vs. NK(75-85 y)+OCs(21-25 y)              | *     | *      |
| NK (75-85 y) vs. NK(21-25 y)+OCs(75-85 y)              | ns    | *      |
| NK (75-85 y) vs. NK(75-85 y)+OCs(75-85 y)              | ns    | ns     |
| NK(21-25 y)+OCs(21-25 y) vs. NK (75-85 y)+OCs(21-25 y) | ns    | *      |
| NK(21-25 y)+OCs(21-25 y) vs. NK (21-25 y)+OCs(75-85 y) | ns    | ns     |
| NK(21-25 y)+OCs(21-25 y) vs. NK (75-85 y)+OCs(75-85 y) | *     | ns     |
| NK(75-85 y)+OCs(21-25 y) vs. NK (21-25 y)+OCs(75-85 y) | ns    | *      |
| NK(75-85 y)+OCs(21-25 y) vs. NK (75-85 y)+OCs(75-85 y) | ns    | ns     |
| NK(21-25 y)+OCs(75-85 y) vs. NK (75-85 y)+OCs(75-85 y) | ****  | ns     |

| C P values                                             | Day 6 | Day 9 | Day 12 | Day 15 | Day 18 | Day 21 | Day 25 |
|--------------------------------------------------------|-------|-------|--------|--------|--------|--------|--------|
| NK (21-25 y) vs. NK(75-85 y)                           | *     | ns    | ns     | ns     |        |        |        |
| NK (21-25 y) vs. NK(21-25 y)+OCs(21-25 y)              | *     | *     | *      | *      |        |        |        |
| NK (21-25 y) vs. NK(75-85 y)+OCs(21-25 y)              | *     | *     | *      | *      |        |        |        |
| NK (21-25 y) vs. NK(21-25 y)+OCs(75-85 y)              | *     | *     | *      | *      |        |        |        |
| NK (21-25 y) vs. NK(75-85 y)+OCs(75-85 y)              | *     | *     | *      | *      |        |        |        |
| NK (75-85 y) vs. NK(21-25 y)+OCs(21-25 y)              | *     | *     | *      | *      |        |        |        |
| NK (75-85 y) vs. NK(75-85 y)+OCs(21-25 y)              | *     | *     | *      | *      |        |        |        |
| NK (75-85 y) vs. NK(21-25 y)+OCs(75-85 y)              | *     | *     | *      | *      |        |        |        |
| NK (75-85 y) vs. NK(75-85 y)+OCs(75-85 y)              | *     | *     | *      | *      |        |        |        |
| NK(21-25 y)+OCs(21-25 y) vs. NK (75-85 y)+OCs(21-25 y) | *     | *     | *      | *      | *      | *      | *      |
| NK(21-25 y)+OCs(21-25 y) vs. NK (21-25 y)+OCs(75-85 y) | *     | *     | *      | *      | *      | *      | *      |
| NK(21-25 y)+OCs(21-25 y) vs. NK (75-85 y)+OCs(75-85 y) | *     | *     | *      | *      | *      | *      | *      |
| NK(75-85 y)+OCs(21-25 y) vs. NK (21-25 y)+OCs(75-85 y) | *     | *     | *      | *      | *      | ns     | ns     |
| NK(75-85 y)+OCs(21-25 y) vs. NK (75-85 y)+OCs(75-85 y) | ns    | *     | *      | *      | *      | ns     | ns     |
| NK(21-25 y)+OCs(75-85 y) vs. NK (75-85 y)+OCs(75-85 y) | *     | *     | *      | ns     | *      | ns     | *      |

| D P values                                             | Day 6 | Day 9 | Day 12 | Day 15 | Day 18 | Day 21 | Day 25 |
|--------------------------------------------------------|-------|-------|--------|--------|--------|--------|--------|
| NK (21-25 y) vs. NK(75-85 y)                           | ns    | *     | ****   | *      |        |        |        |
| NK (21-25 y) vs. NK(21-25 y)+OCs(21-25 y)              | *     | *     | *      | ns     |        |        |        |
| NK (21-25 y) vs. NK(75-85 y)+OCs(21-25 y)              | *     | *     | *      | *      |        |        |        |
| NK (21-25 y) vs. NK(21-25 y)+OCs(75-85 y)              | *     | *     | *      | *      |        |        |        |
| NK (21-25 y) vs. NK(75-85 y)+OCs(75-85 y)              | *     | *     | *      | *      |        |        |        |
| NK (75-85 y) vs. NK(21-25 y)+OCs(21-25 y)              | *     | *     | *      | *      |        |        |        |
| NK (75-85 y) vs. NK(75-85 y)+OCs(21-25 y)              | *     | *     | *      | *      |        |        |        |
| NK (75-85 y) vs. NK(21-25 y)+OCs(75-85 y)              | ****  | *     | *      | *      |        |        |        |
| NK (75-85 y) vs. NK(75-85 y)+OCs(75-85 y)              | *     | *     | *      | *      |        |        |        |
| NK(21-25 y)+OCs(21-25 y) vs. NK (75-85 y)+OCs(21-25 y) | *     | *     | *      | *      | *      | *      | *      |
| NK(21-25 y)+OCs(21-25 y) vs. NK (21-25 y)+OCs(75-85 y) | *     | *     | *      | ns     | *      | *      | ns     |
| NK(21-25 y)+OCs(21-25 y) vs. NK (75-85 y)+OCs(75-85 y) | *     | *     | *      | ns     | *      | ****   | *      |
| NK(75-85 y)+OCs(21-25 y) vs. NK (21-25 y)+OCs(75-85 y) | *     | *     | *      | *      | *      | *      | *      |
| NK(75-85 y)+OCs(21-25 y) vs. NK (75-85 y)+OCs(75-85 y) | *     | *     | *      | *      | ns     | *      | ns     |
| NK(21-25 y)+OCs(75-85 y) vs. NK (75-85 y)+OCs(75-85 y) | *     | *     | ns     | *      | *      | *      | *      |

**Supplementary Figure 5. Old-age donor-derived OCs induced lower levels of activation in NK cells.** Osteoclasts (OCs) were generated as described in the Materials and Methods section. NK cells and OCs co-culture was performed as described in Fig. S4. NK cell-mediated cytotoxicity against OSCSCs was determined on days 9 and 15 using a standard 4-hour <sup>51</sup>Cr release assay. The lytic units 30/10<sup>6</sup> cells were determined using the inverse number of NK cells required to lyse 30% of OSCSCs x 100 (A). Lytic units per 1 % NK cells were determined based on the percentages of CD16+CD56+ NK cells in the cultures obtained by flow cytometric analysis (B). The supernatants were harvested from the cultures on days 6, 9, 12, 15, 18, 21, and 25 to determine IFN- $\gamma$  secretion using single ELISA (C), and the levels IFN- $\gamma$  pg/ml were adjusted based on per million of cells (D). \*\*\*\*( $p$ -value <0.0001), \*\*\*( $p$ -value 0.0001-0.001).
