# Supplementary material for: Decreased surface receptors, function, and suboptimal osteoclasts-induced cell expansion in natural killer (NK) cells of elderly subjects
Source: publisher site journal article supplement (doi:10.18632/aging.206226), 2025-03-26
Supplement: Supplementary file [file aging-v17i3-206226-supplementary-material-SD2.pdf]

**SUPPLEMENTARY TABLES**

**Supplementary Table 1. Decreased levels of cytotoxicity, and IFN- $\gamma$  secretions in NK cells from an older donor**

**Supplementary Table 1A**

|                             | <b>Exp # 1</b> |           | <b>Exp # 2</b> |           | <b>Exp # 3</b> |           |
|-----------------------------|----------------|-----------|----------------|-----------|----------------|-----------|
|                             | 21-25 yrs      | 75-85 yrs | 21-25 yrs      | 75-85 yrs | 21-25 yrs      | 75-85 yrs |
| LU 30/10 <sup>6</sup> cells |                |           |                |           |                |           |
| Untreated NK                | 46             | 19        | 34             | 21        | 54             | 31        |
| NK + IL-2                   | 120            | 76        | 143            | 109       | 133            | 127       |
| NK + IL-2 + anti-CD16 mAbs  | 24             | 19        | 87             | 48        | 63             | 51        |

**Supplementary Table 1B**

|                            | <b>Exp # 1</b> |           | <b>Exp # 2</b> |           | <b>Exp # 3</b> |           |
|----------------------------|----------------|-----------|----------------|-----------|----------------|-----------|
|                            | 21-25 yrs      | 75-85 yrs | 21-25 yrs      | 75-85 yrs | 21-25 yrs      | 75-85 yrs |
| IFN- $\gamma$ (pg/ml)      |                |           |                |           |                |           |
| Untreated NK               | 54             | 46        | 48             | 39        | 33             | 61        |
| NK + IL-2                  | 128            | 97        | 176            | 106       | 159            | 127       |
| NK + IL-2 + anti-CD16 mAbs | 199.88         | 142.55    | 302            | 139       | 263            | 181       |

NK cells were left untreated or were treated with IL-2 (1000 U/ml) or with a combination of IL-2 (1000 U/ml) and anti-CD16 mAbs (3  $\mu$ g/ml) for 18 hours before they were used as effectors in standard 4-hour <sup>51</sup>Cr release assay against OSCSCs (n=3, **A**). The lytic units 30/10<sup>6</sup> cells were determined using the inverse number of NK cells required to lyse 30% of tumors X 100. NK cells left untreated or treated with IL-2 (1000 U/ml) or with a combination of IL-2 (1000 U/ml) and anti-CD16 mAbs (3  $\mu$ g/ml) for 18 hours before the supernatants were harvested to determine IFN- $\gamma$  secretion using single ELISA (n=3, **B**).

**Supplementary Table 2. OCs induced lower levels of cytotoxic activity in old-age donor NK cells**

**Supplementary Table 2A**

|                             | <b>Exp # 1</b> |           | <b>Exp # 2</b> |           | <b>Exp # 3</b> |           |
|-----------------------------|----------------|-----------|----------------|-----------|----------------|-----------|
|                             | 21-25 yrs      | 75-85 yrs | 21-25 yrs      | 75-85 yrs | 21-25 yrs      | 75-85 yrs |
| LU 30/10 <sup>6</sup> cells |                |           |                |           |                |           |
| Day 12                      | 344            | 42        | 423            | 86        | 412            | 71        |
| Day 30                      | 357            | 26        | 256            | 38        |                |           |

**Supplementary Table 2B**

|                                     | <b>Exp # 1</b> |           | <b>Exp # 2</b> |           | <b>Exp # 3</b> |           |
|-------------------------------------|----------------|-----------|----------------|-----------|----------------|-----------|
|                                     | 21-25 yrs      | 75-85 yrs | 21-25 yrs      | 75-85 yrs | 21-25 yrs      | 75-85 yrs |
| LU 30/10 <sup>6</sup> cells/ 1 NK % |                |           |                |           |                |           |
| Day 12                              | 4.4444444      | 1.5       | 4.752809       | 1.4827586 | 4.9638554      | 1.0441176 |
| Day 30                              | 4.890411       | 1.8571429 | 2.7526882      | 1.4074074 | na             | na        |

Osteoclasts (OCs) were generated as described in the Materials and Methods section. NK cells and OCs co-culture was performed as described in Figure S1. NK cell-mediated cytotoxicity against OSCSCs was determined on days 9 and 15 using a standard 4-hour <sup>51</sup>Cr release assay. The lytic units 30/10<sup>6</sup> cells were determined using the inverse number of NK cells required to lyse 30% of OSCSCs x 100 (**A**). Lytic units per 1 % NK cells were determined based on the percentages of CD16+/CD56+ NK cells in the cultures obtained by flow cytometric analysis (**B**).
